# Supplementary material
Source: publisher site journal article supplement (https://www.kjim.org/upload/media/kjim-2023-167-Supplementary-Table-3.pdf)
Supplement: Supplementary file 1 [file kjim-2023-167-Supplementary-Table-3.pdf]

**Supplementary Table 3. Multivariate analysis to evaluate the histological features associated with disease progression in UC patients with mild endoscopic activity**

| Histologic feature                   | OR (95% CI)         | <i>p</i> value |
|--------------------------------------|---------------------|----------------|
| Serrated architectural abnormalities | 1.76 (0.82–3.79)    | 0.147          |
| Nancy index                          | 2.071 (0.964–4.447) | 0.062          |

CI, confidence interval; OR, odds ratio; UC, ulcerative colitis.
